# Supplementary material
Source: MDPI journal article supplement (https://www.mdpi.com/2305-7084/7/5/79)
Supplement: s1 [file s1]

## Supplementary materials

### Interconversion and removal of inorganic nitrogen compounds via UV irradiation

Alejandro M. Senn<sup>1\*</sup>, Natalia Quici<sup>1,2\*</sup>

- <sup>1.</sup> *División Química de la Remediación Ambiental, Centro Atómico Constituyentes, CNEA, CONICET, Gral. Paz 1499, San Martín Buenos Aires, Argentina.*
- <sup>2.</sup> *Centro de Tecnologías Químicas, Departamento de Ingeniería Química, FRBA-UTN, Buenos Aires, Argentina.*

#### Supporting material

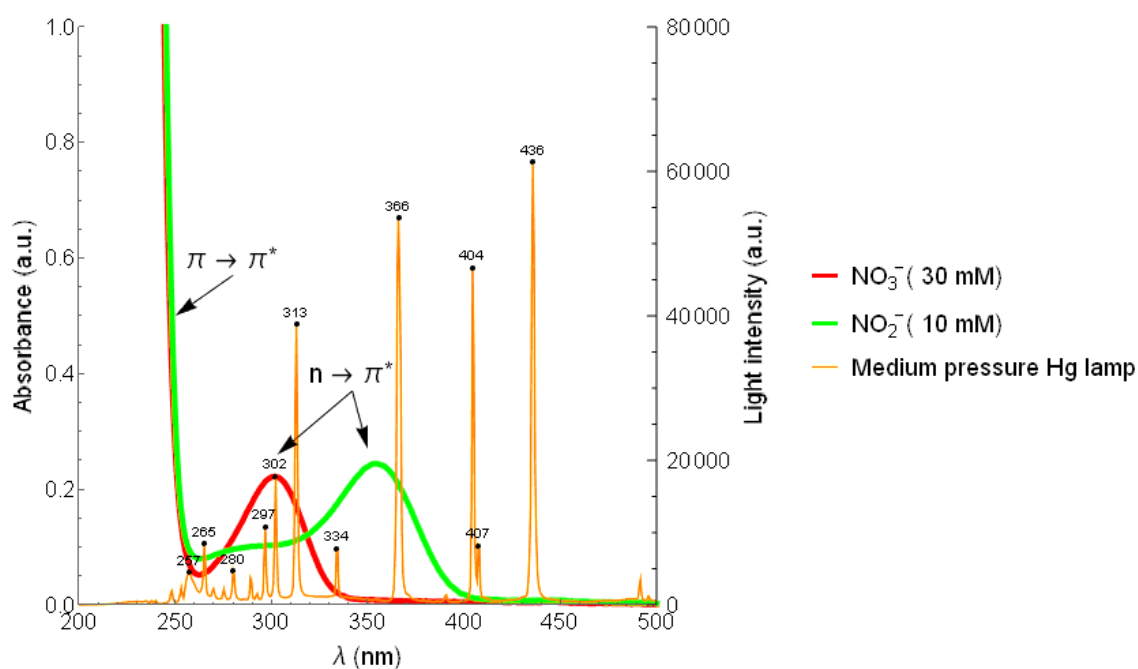

Figure S1. Absorption UV-vis spectra of  $\text{NO}_3^-$  and  $\text{NO}_2^-$  measured at pH 10.5. Electronic transitions are indicated. The emission spectrum of the medium pressure Hg lamp used in these experiments is superimposed.
